# Supplementary material
Source: PubMed Central journal article supplement (PMC6872916)

**Supplemental Figure 1:** Additional Toxicity Data. Cell counts of individual patients throughout their treatment course, including at baseline, after apheresis, after bridging radiation (XRT), at time of flu/cy conditioning, at time of CAR T infusion and at subsequent follow-up. (a) white blood cell counts (WBC), (b) absolute neutrophil counts (ANC), (c) absolute lymphocyte counts (ALC), (d) hemoglobin levels (Hgb), and (e) platelet counts (Plt).

Supplemental Figure 1(a)

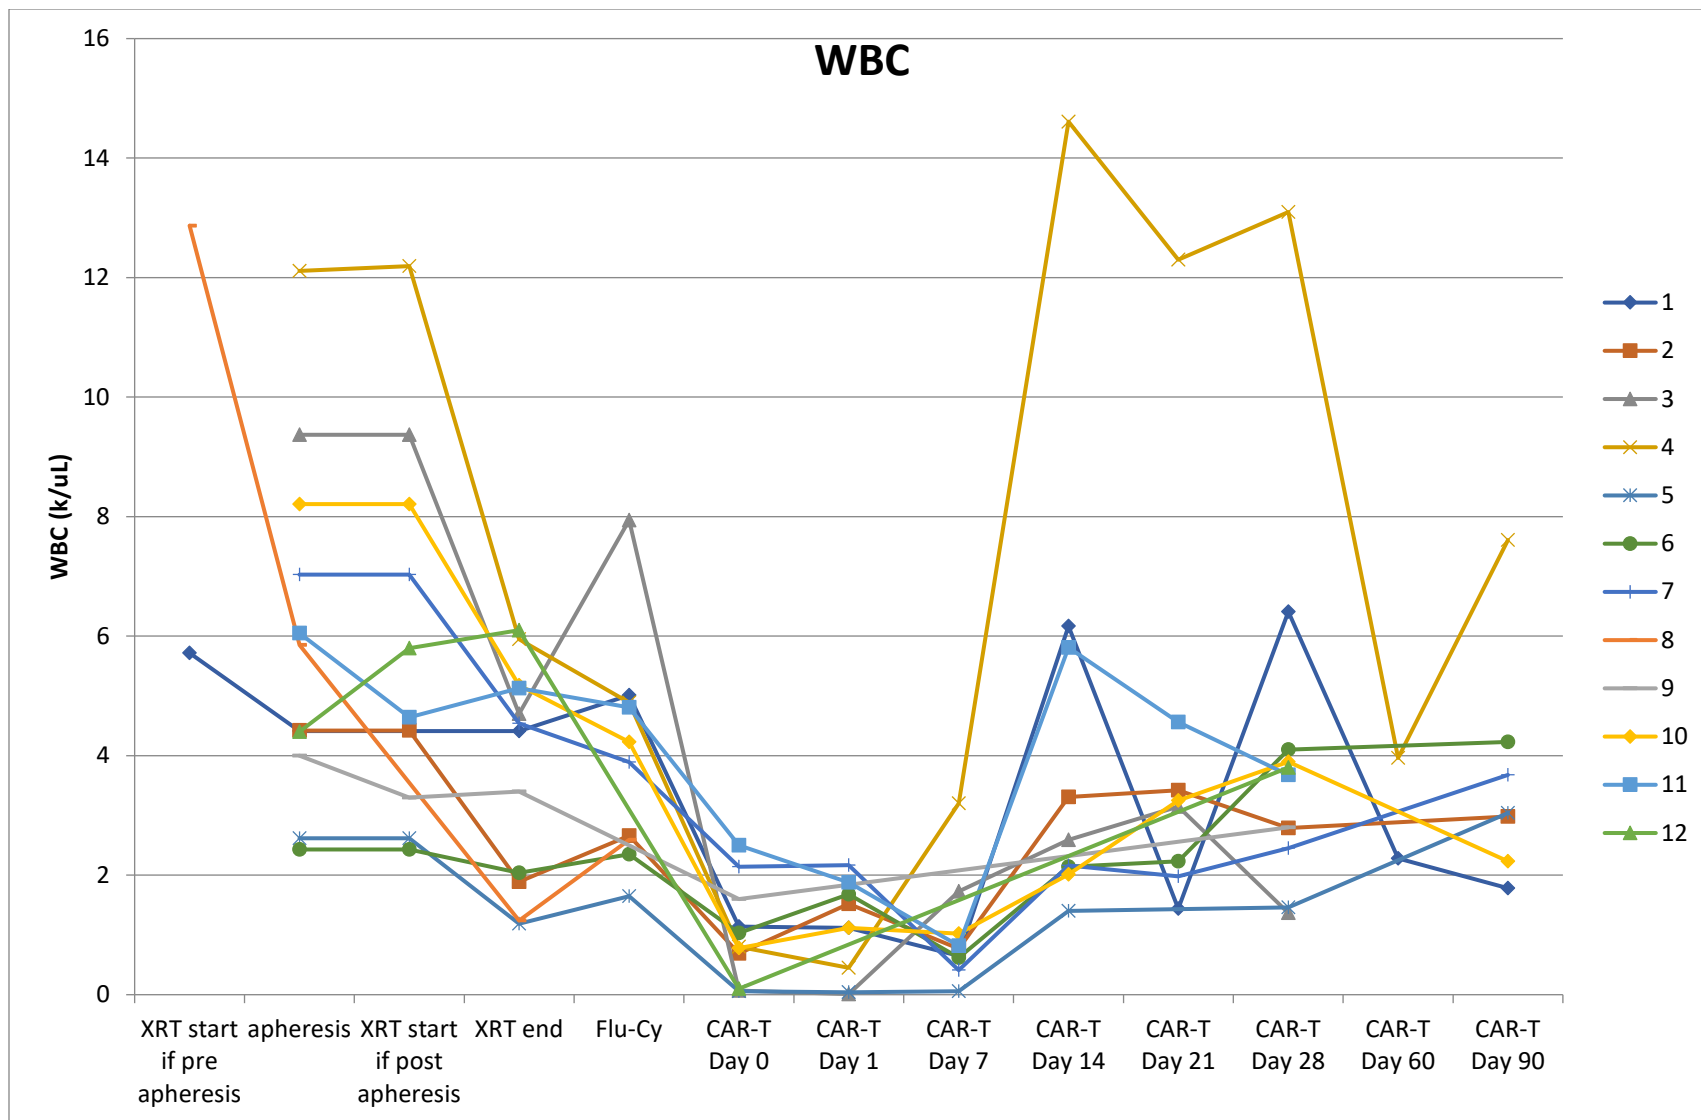

Supplemental Figure 1(b)

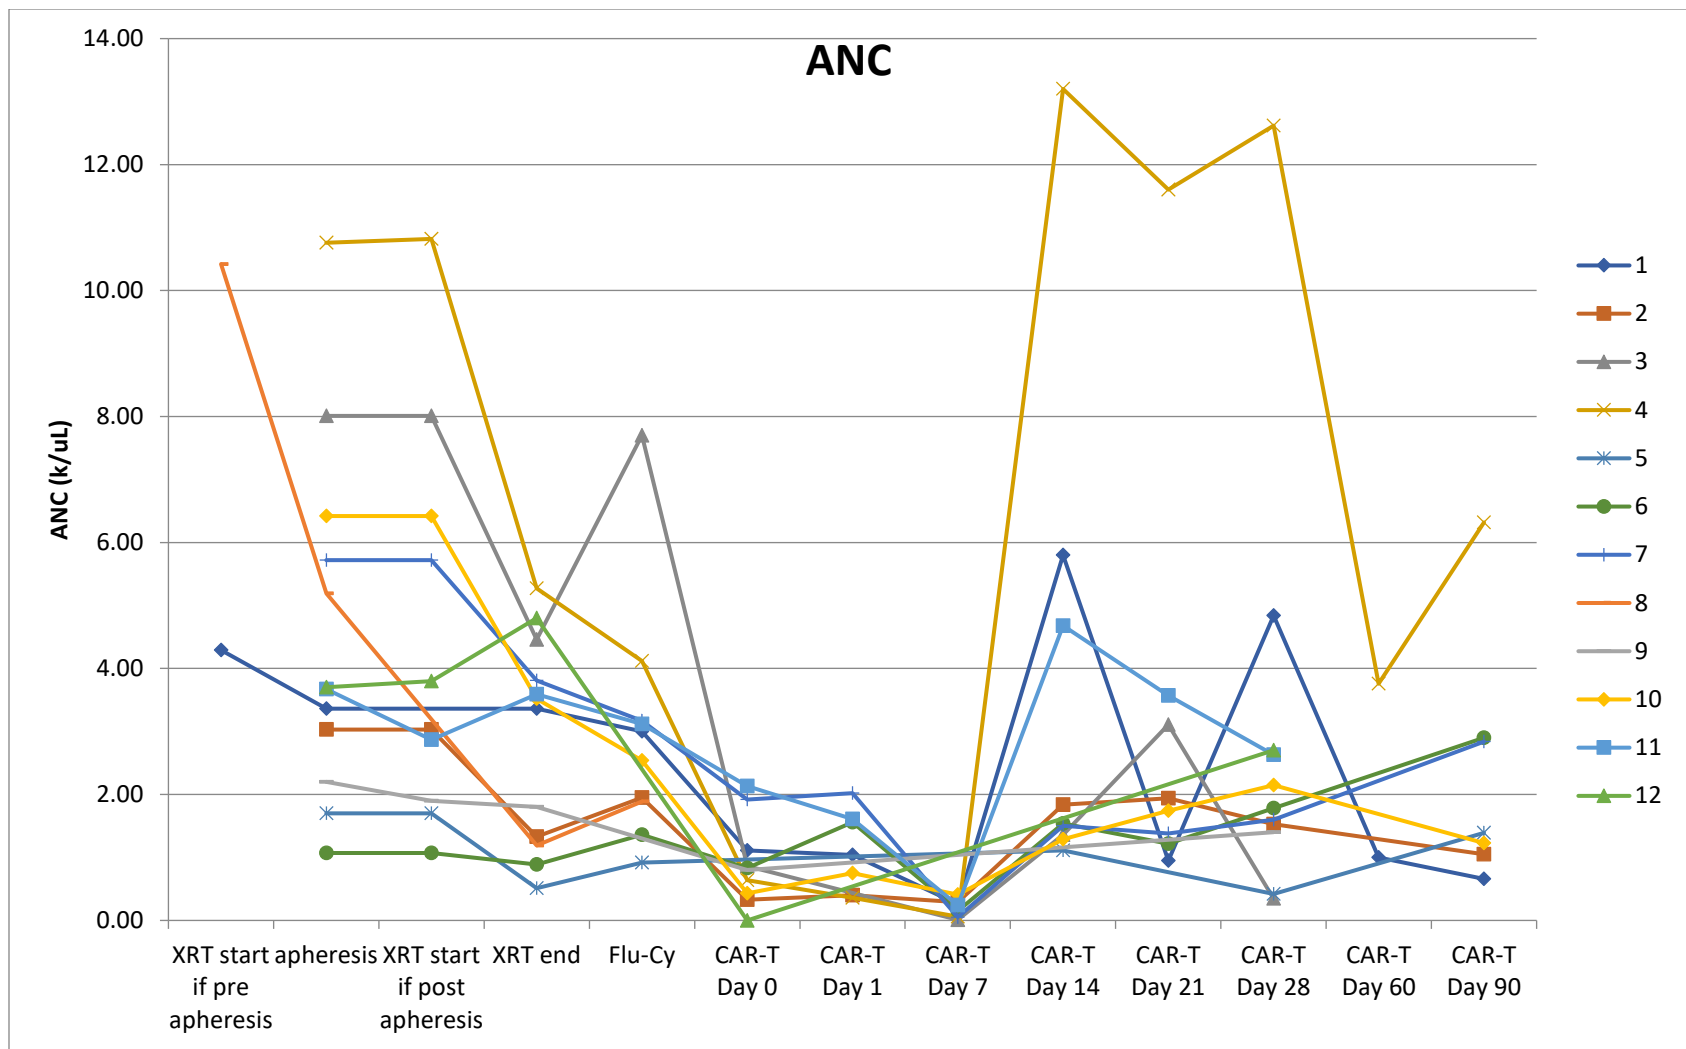

Supplemental Figure 1(c)

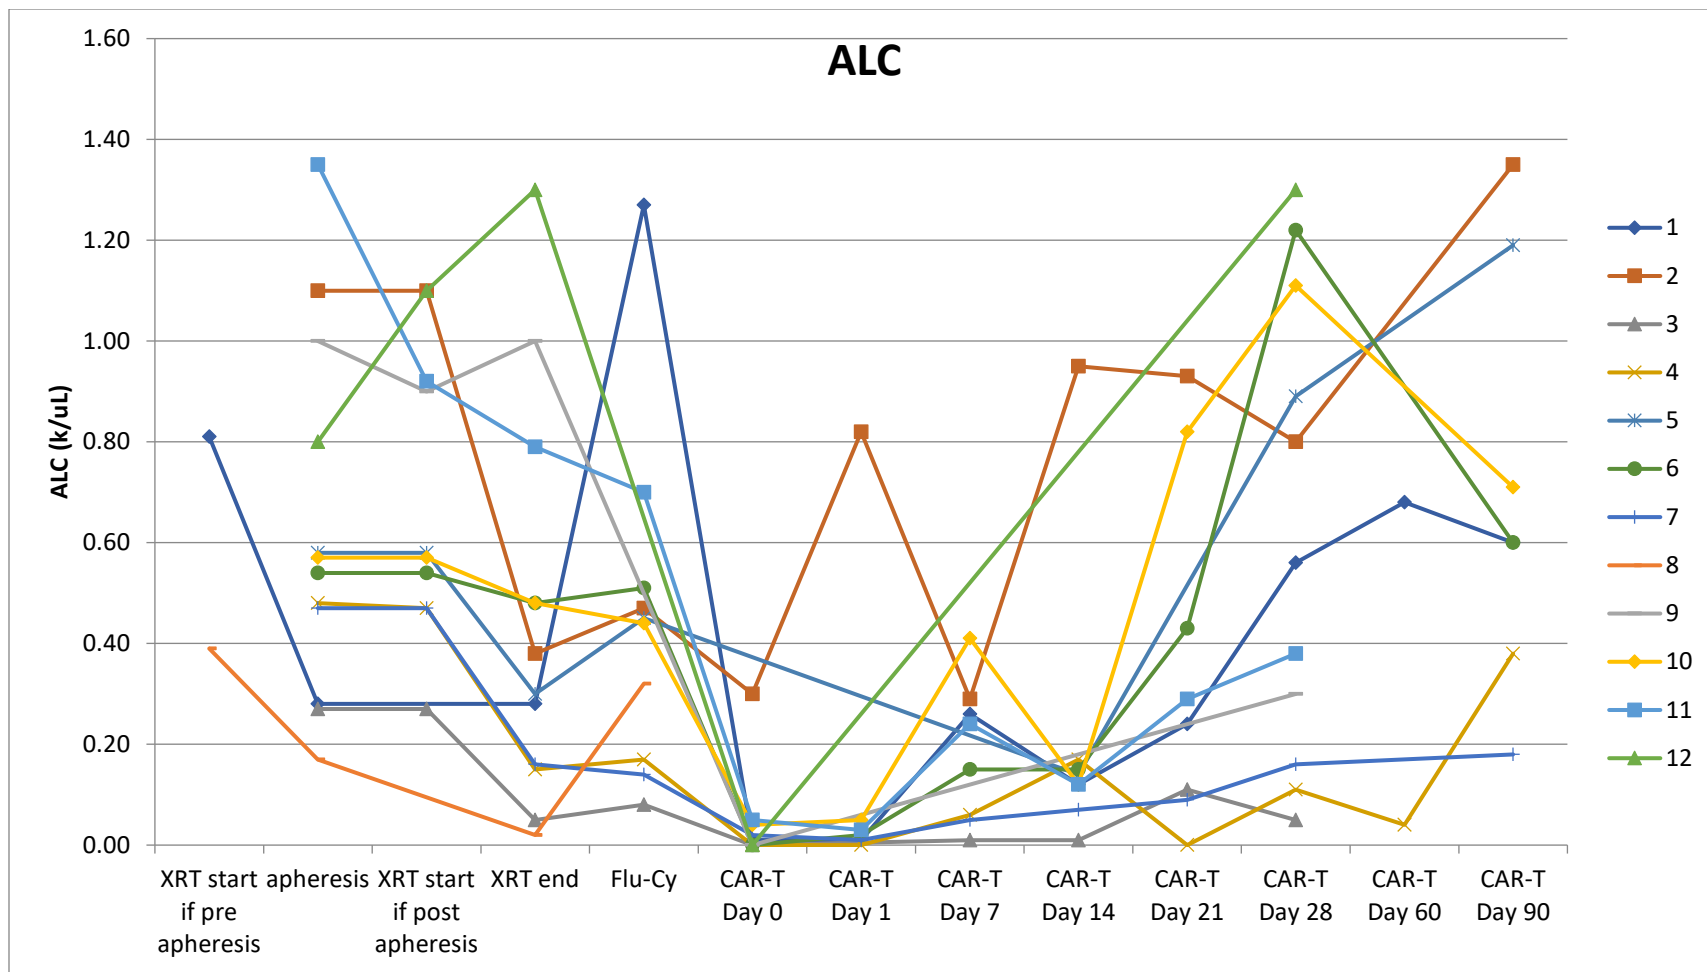

Supplemental Figure 1(d)

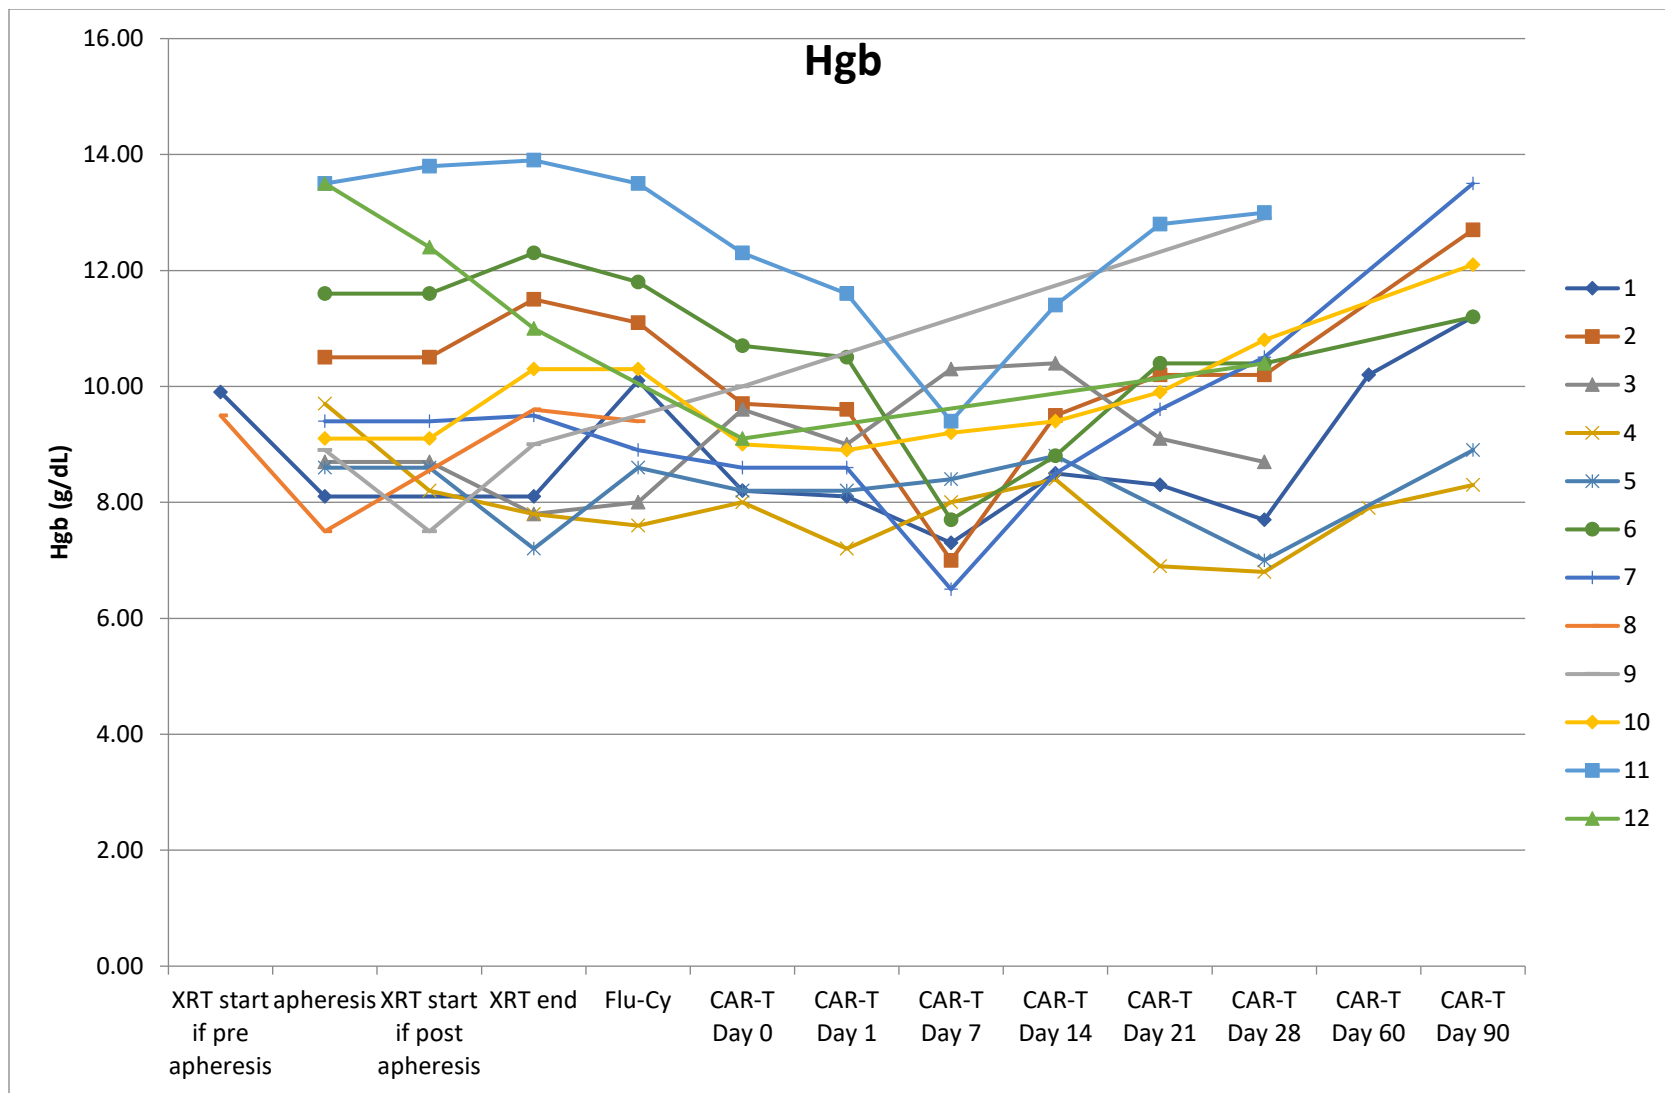

Supplemental Figure 1(e)

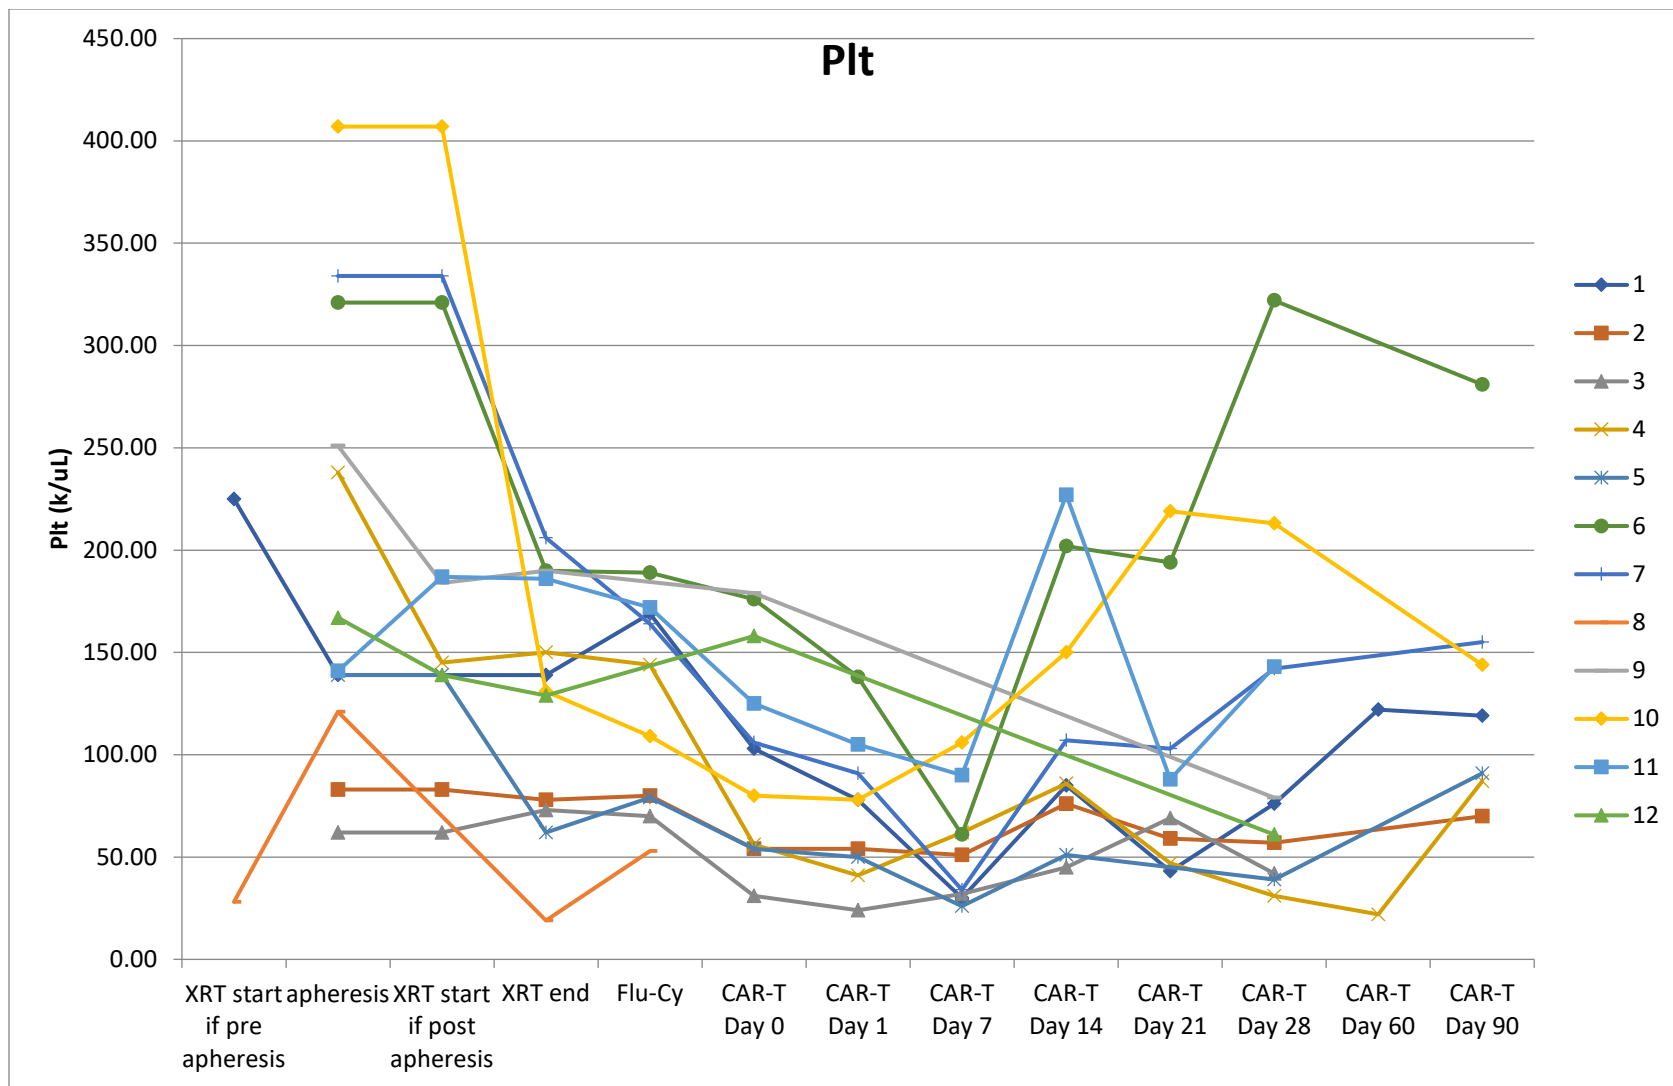

Supplement: NIHMS1046255-supplement-S1.pdf [file NIHMS1046255-supplement-S1.pdf]
