# Supplementary material
Source: PubMed Central journal article supplement (PMC6872916)

**Supplemental Figure 2:** Inflammatory Marker Data. Serum levels of C-reactive protein and ferritin of individual patients throughout their treatment course, including at baseline, after bridging radiation prior to flu/cy conditioning, and peak levels after CAR T infusion. Data for patients 9 and 12 were not available.

2a: C reactive protein

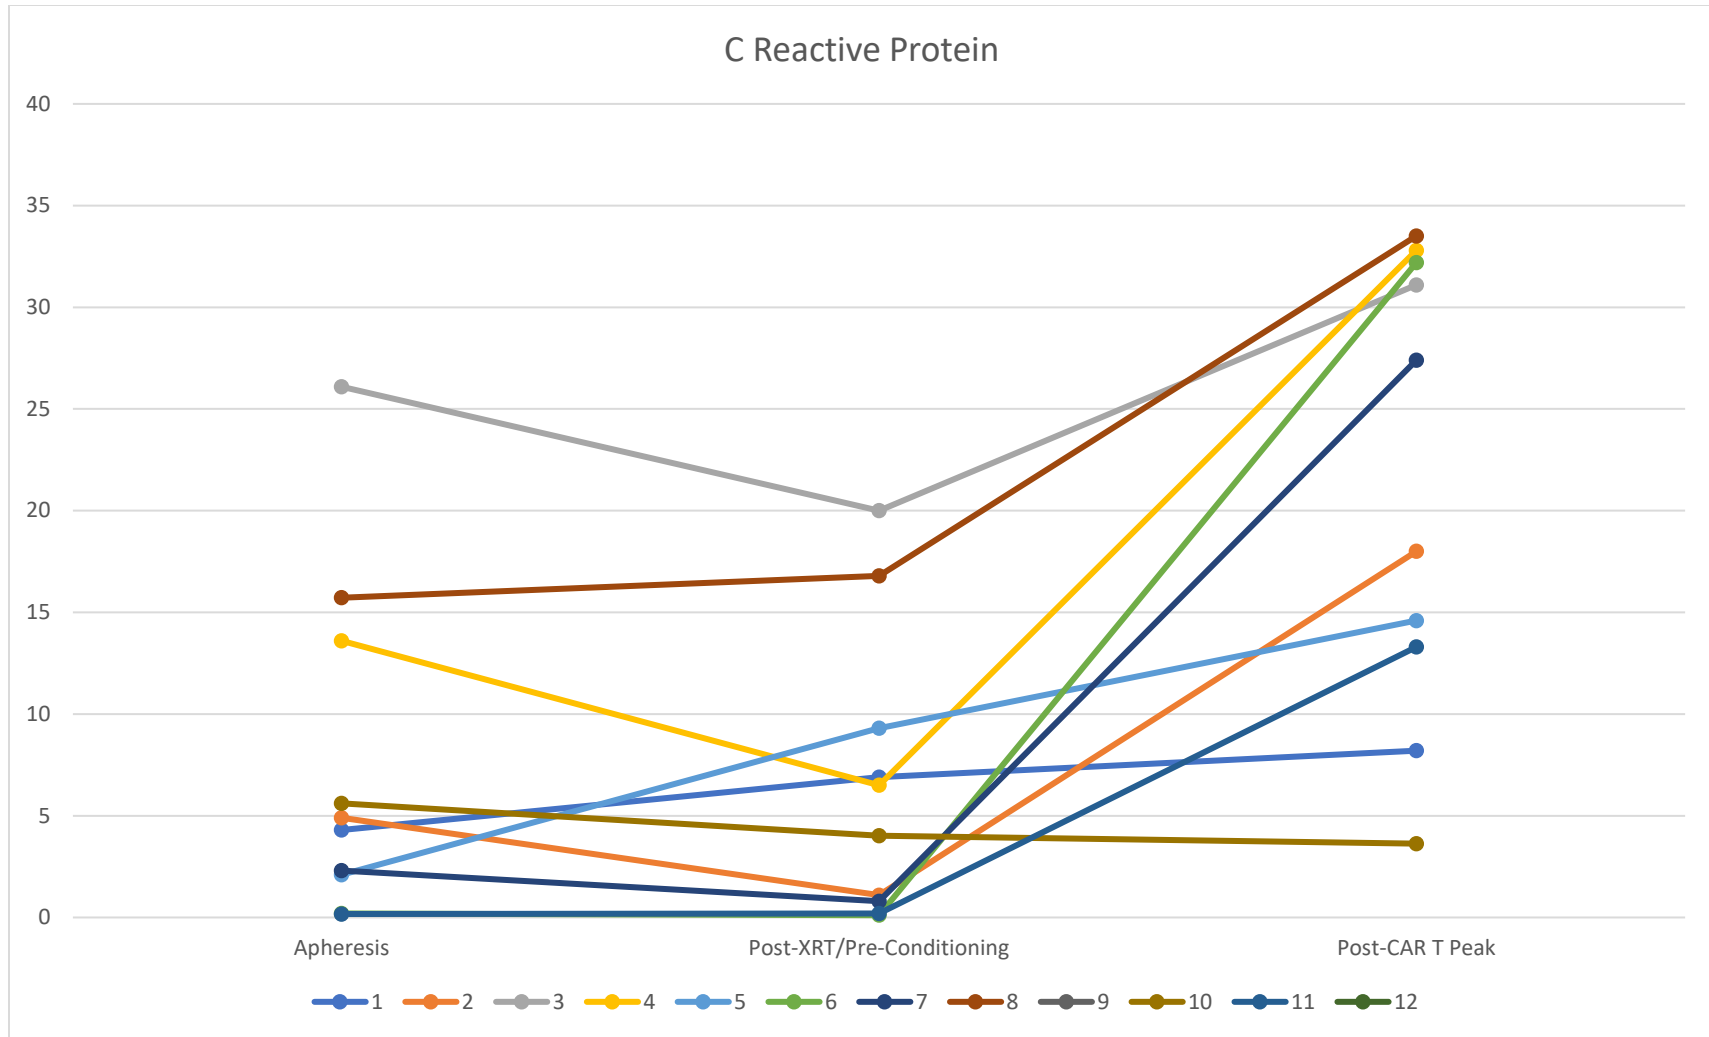

## 2b: Ferritin

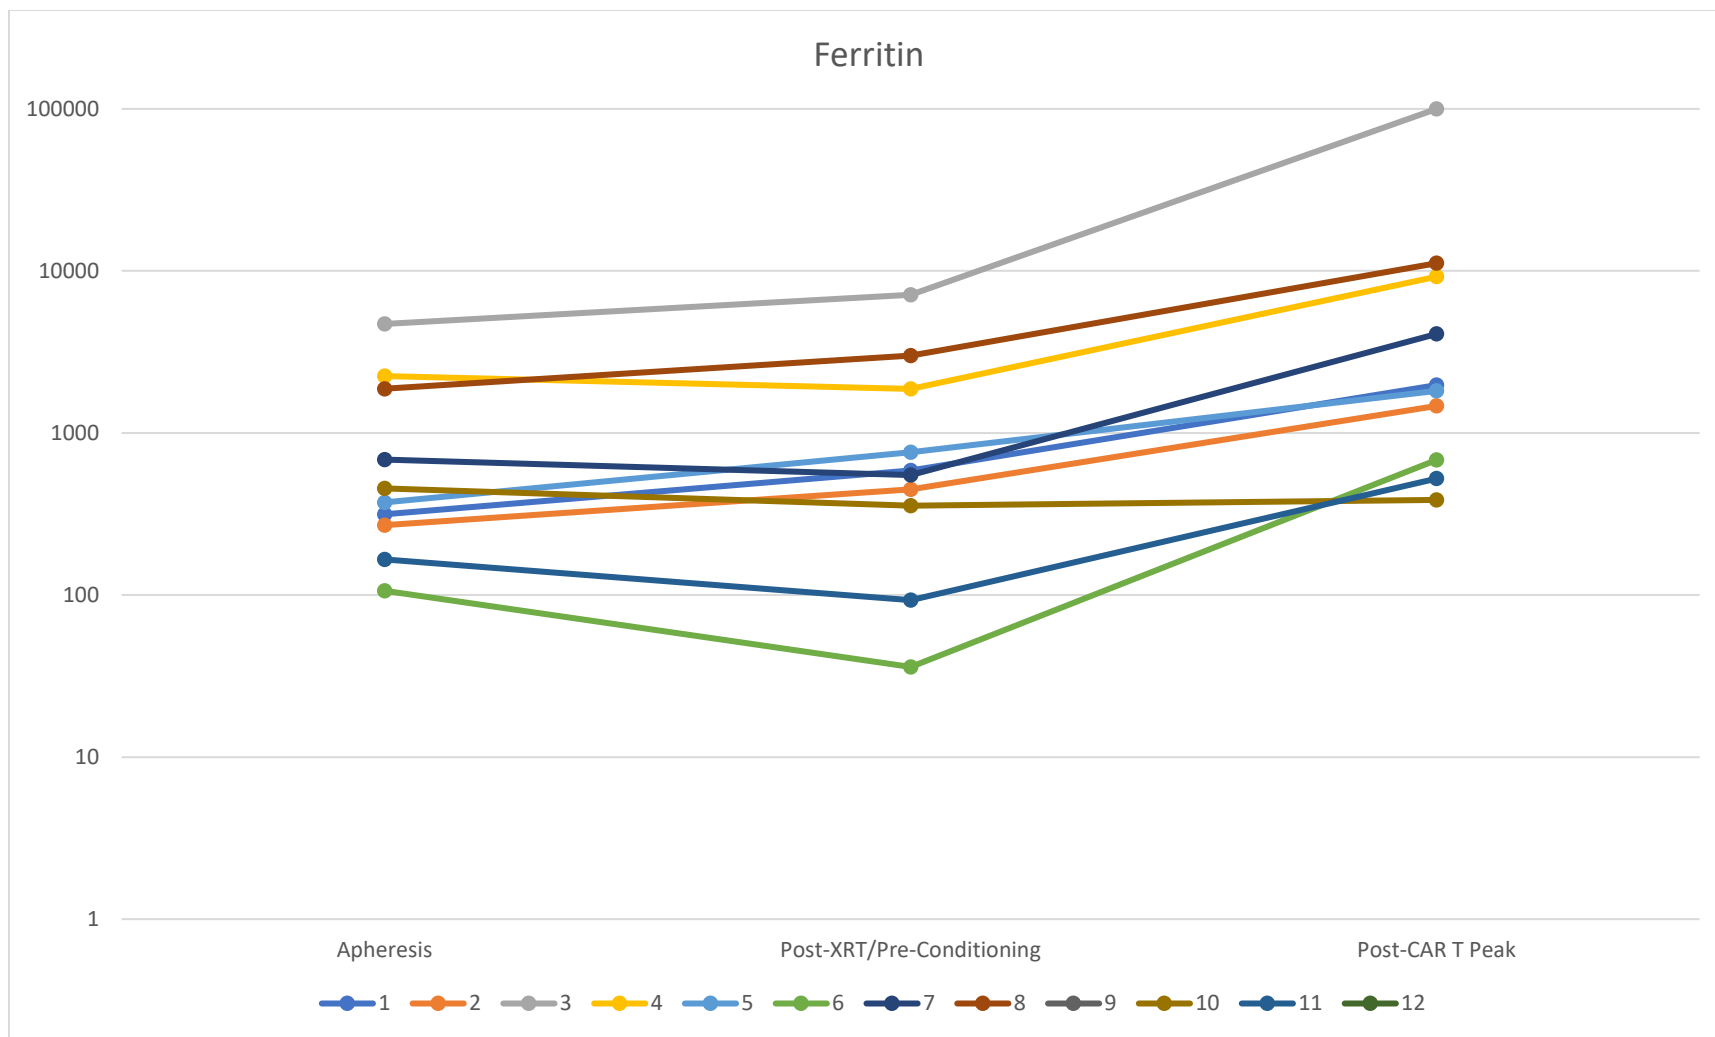

Supplement: NIHMS1046255-supplement-S2.pdf [file NIHMS1046255-supplement-S2.pdf]
